# Supplementary material for: Influence of Shear Stress, Inflammation and BRD4 Inhibition on Human Endothelial Cells: A Holistic Proteomic Approach
Source: MDPI journal article supplement (doi:10.3390/cells11193086), 2022-09-30
Supplement: s1 [file s1]

## **Supplement Materials**

**„Influence of Shear Stress, Inflammation and BRD4 Inhibition on  
Human Endothelial Cells: A Holistic Proteomic Approach“**

**Jarauschk et al.**

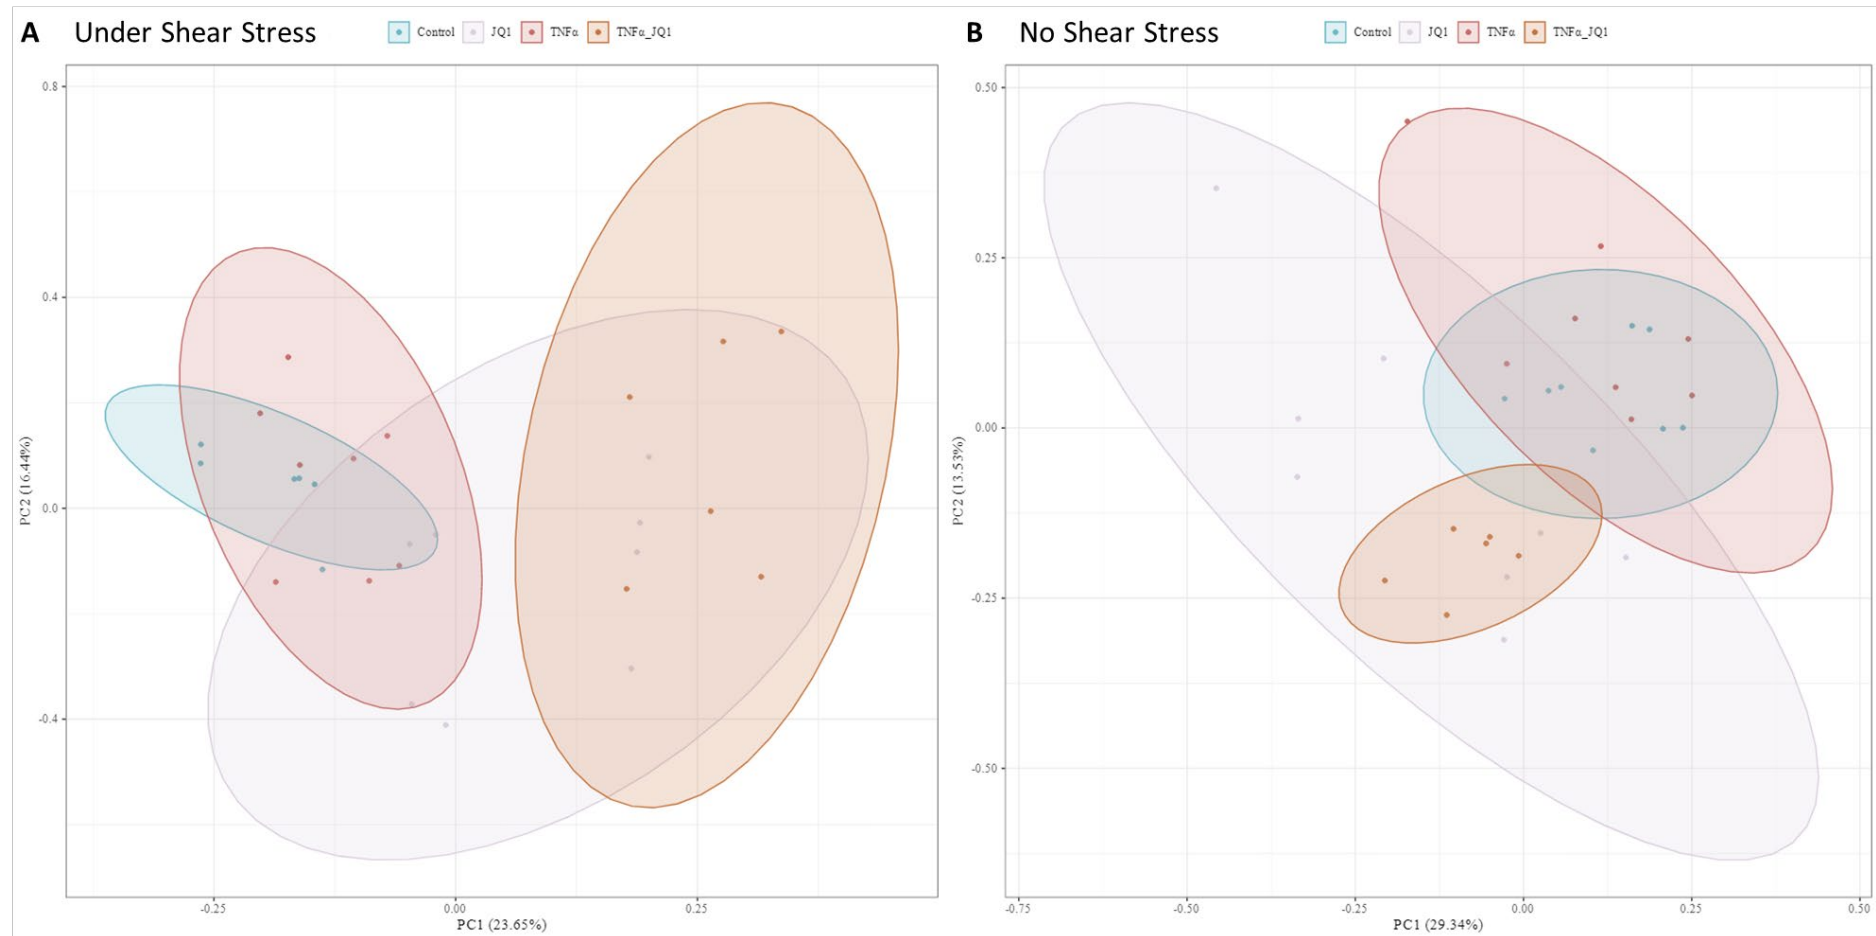

**Figure S1. Principal component analysis of all groups under and without SS.** (A) A PCA of all groups under and without shear stress (SS) was performed. The first two principal components are shown. The groups treated with TNF $\alpha$  + JQ1 show distinct clustering, whereas the groups treated

only with JQ1 did not separate as well. **(B)** Under no SS all groups treated with JQ1 show a pattern distinctive from groups that did not receive JQ1 treatment.

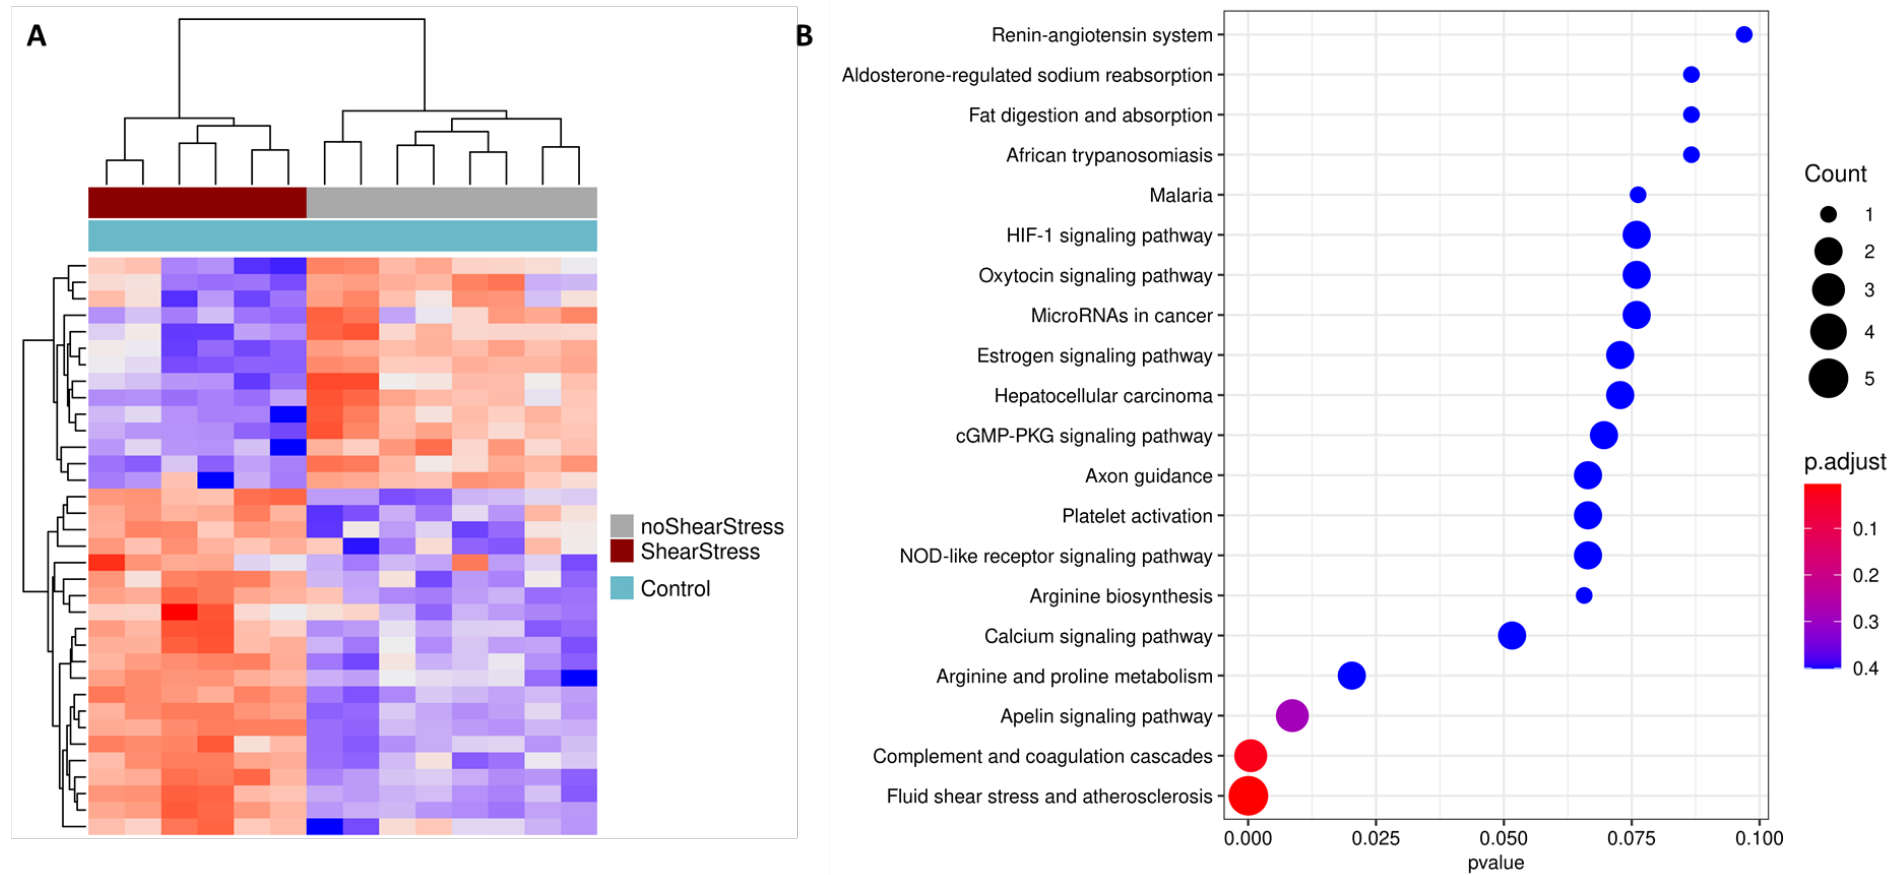

**Figure S2. Heat map of all tested proteins between control groups under SS vs. no SS and overrepresented KEGG-pathways.** (A) Heat map of all proteins between control group under shear stress (SS) or not were selected. The colours show normalized expression values for the differentially expressed proteins (rows) across samples (columns). Both rows and columns are ordered by hierarchical clustering. The clustering is visualized using dendrograms at the top and at the left. The treatment groups show distinct clustering. (B) Overrepresented Kyoto Encyclopedia of Genes and Genomes (KEGG) pathways are ordered according to significance (most significantly enriched pathway at the bottom) and coloured by p value. The size of the points represents the count of proteins per pathway. The significantly differential pathways “Fluid shear stress and atherosclerosis” and “Complement and coagulation cascades” are represented at the bottom.

# Shear Stress vs. Control

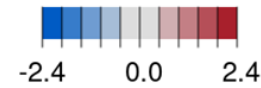

## FLUID SHEAR STRESS AND ATHEROSCLEROSIS

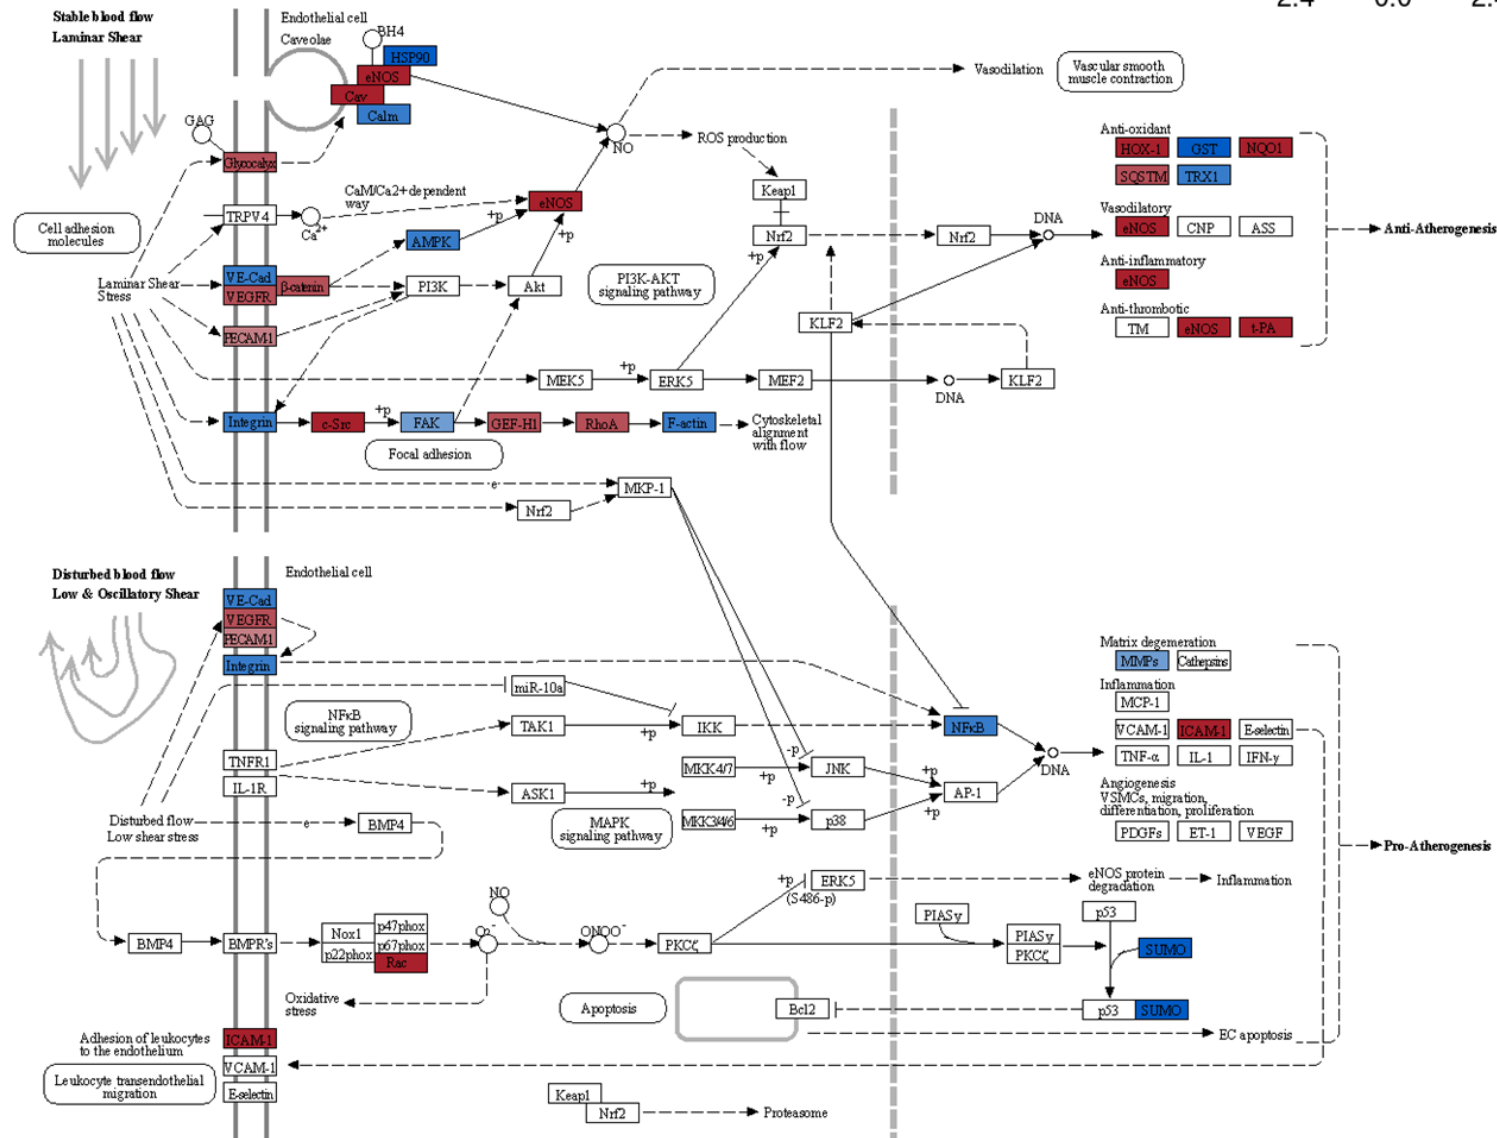

Data on KEGG graph  
Rendered by Pathview

**Figure S3. Proteins in the overrepresented KEGG-pathway “Fluid shear stress and atherosclerosis” coloured by log fold change from the comparison between shear stress and control groups.** All measured proteins mapped to this pathway are coloured by log fold change (blue for downregulated compared to control, red for upregulated).

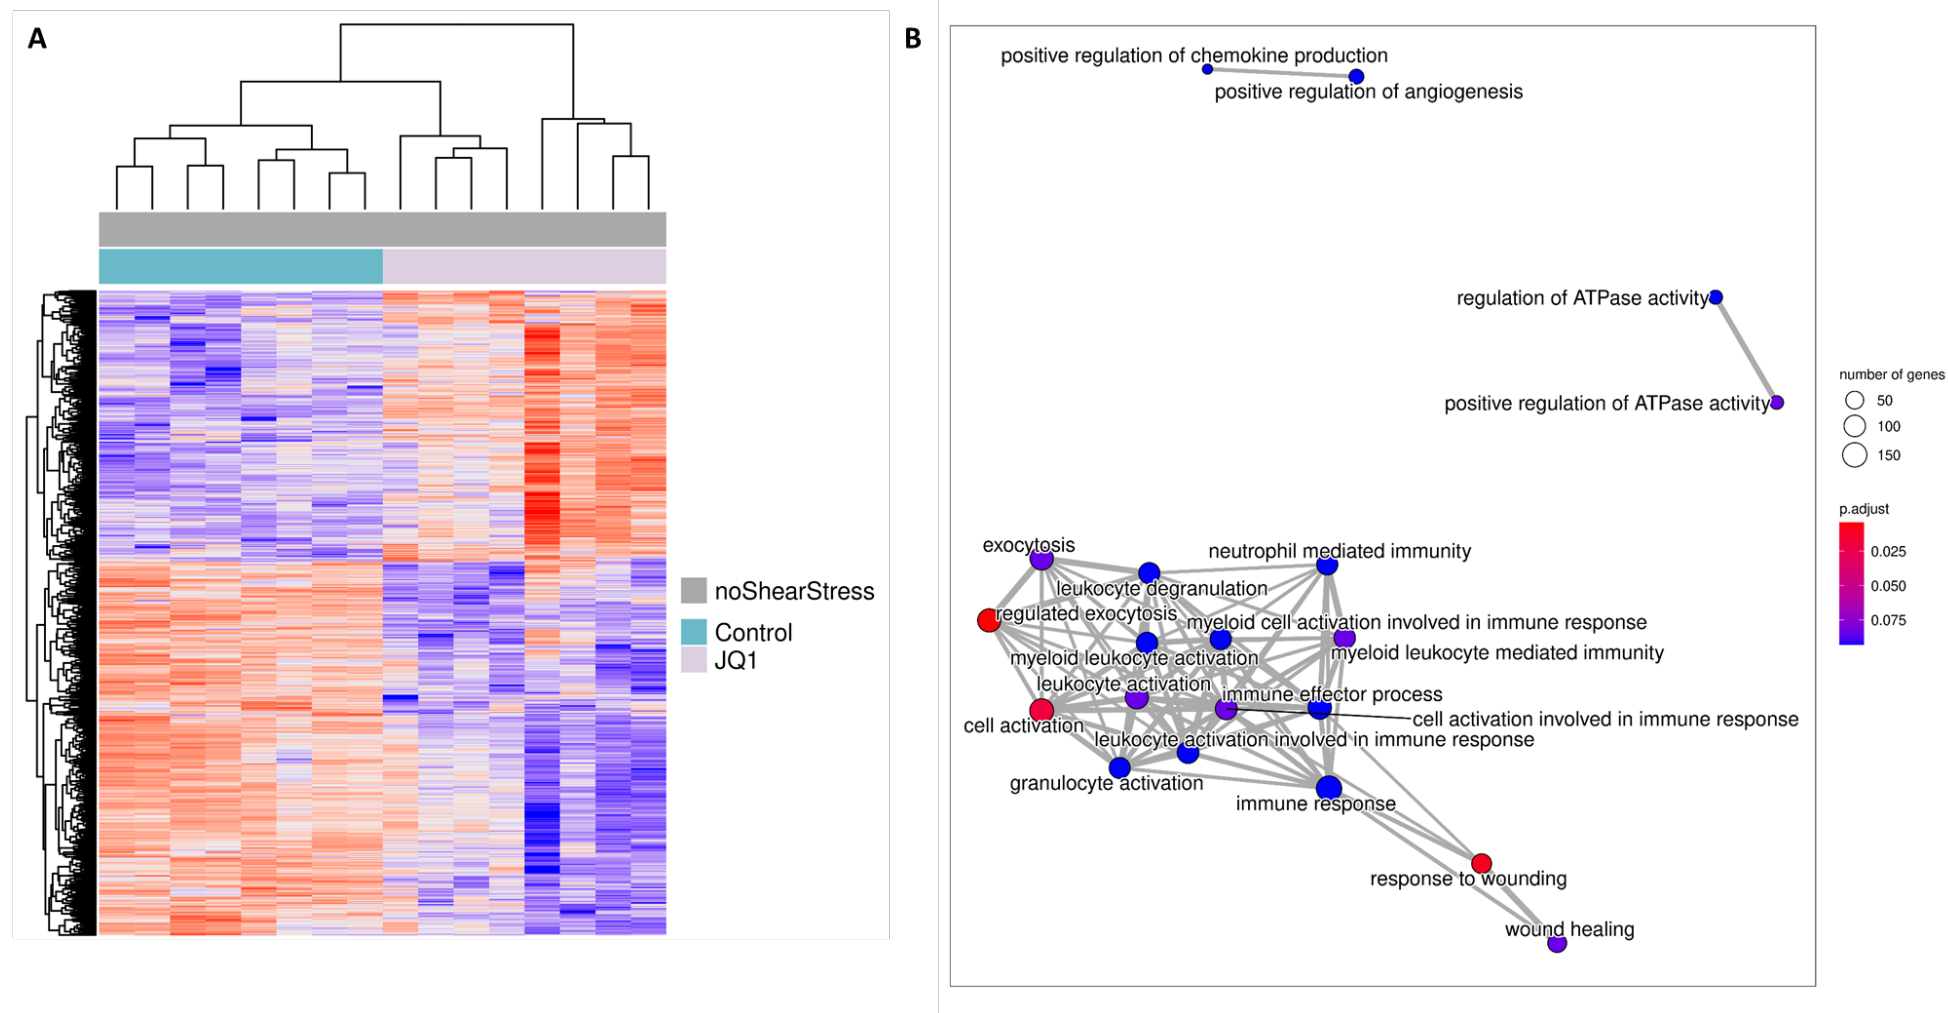

**Figure S4. Heat map of all tested proteins under JQ1 without SS in comparison to control and enrichment network-map of the top 20 overrepresented GO terms. (A)** All proteins between control and JQ1 treatment without shear stress (SS) were selected. The colours show

normalized expression values for the differentially expressed proteins (rows) across samples (columns). Both rows and columns are ordered by hierarchical clustering. The clustering is visualized using dendrograms at the top and at the left. The treatment groups show distinct clustering. **(B)**

The dots represent the most overrepresented gene ontology (GO) terms with sizes according to the number of proteins associated with the term. The colour of the dots represents the statistical significance according to the adjusted p value. The width of the connecting lines is according to the number of shared proteins. “Cell activation” and “regulated exocytosis” are closely associated.



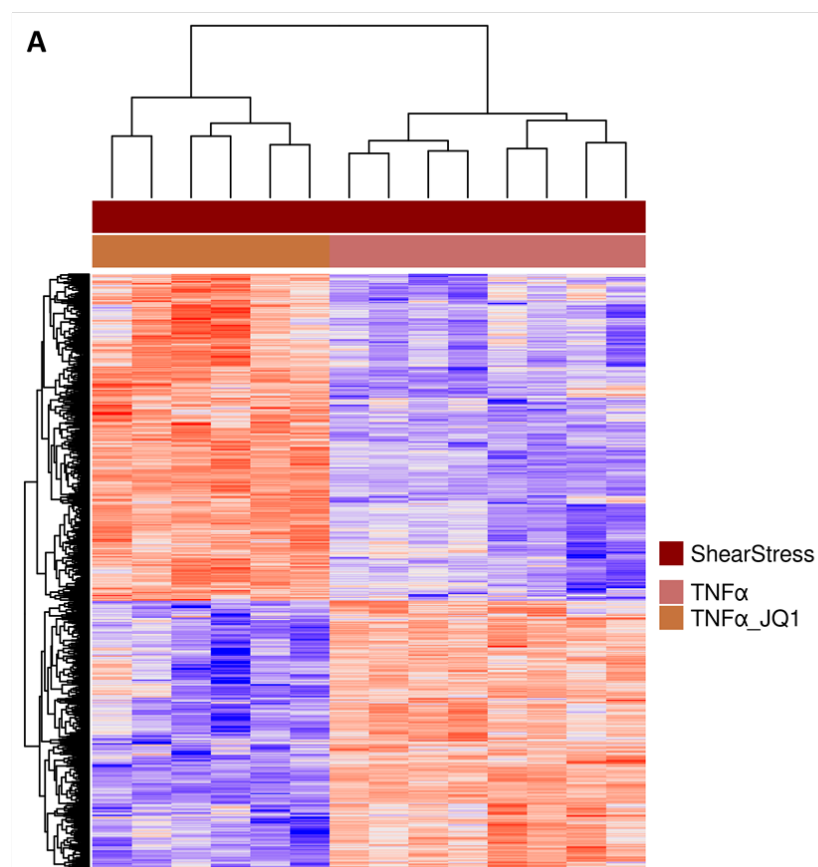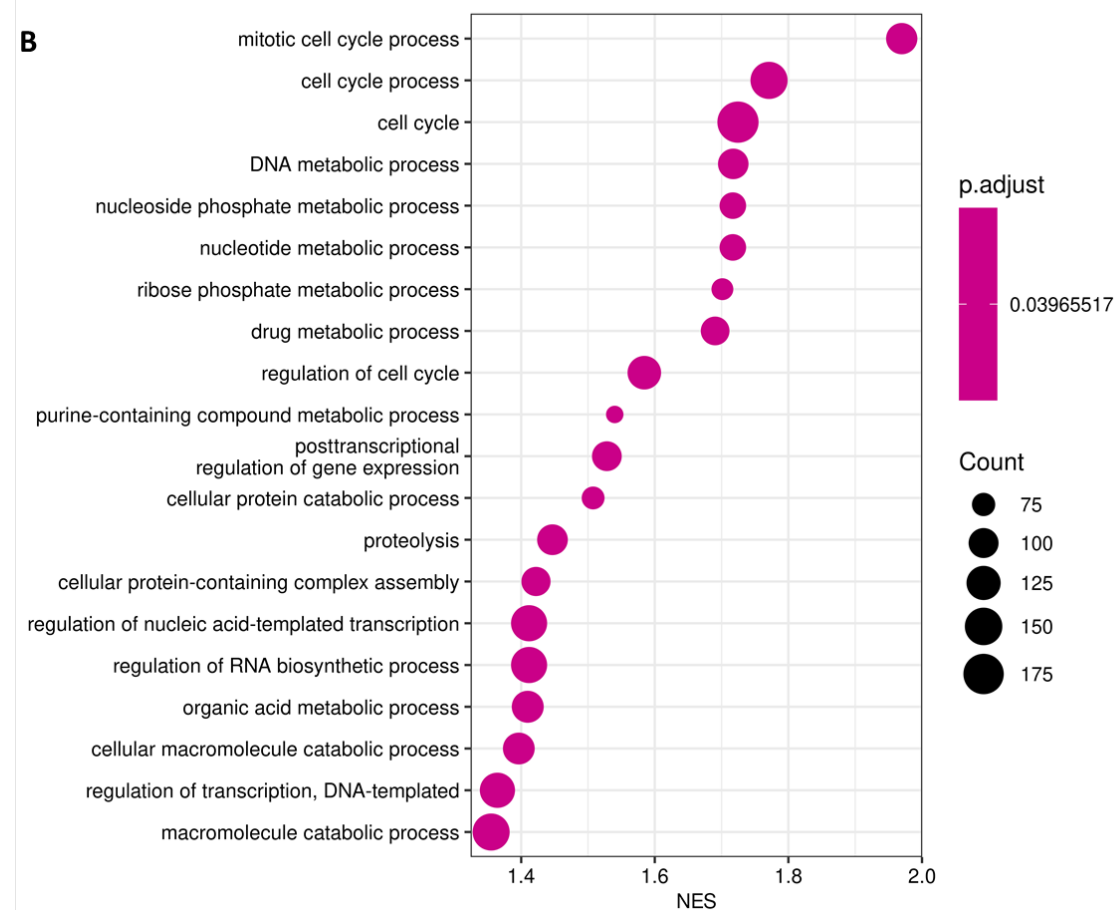

**Figure S5. Heat map of all tested proteins in the TNFα + JQ1 under SS vs. TNFα under SS treatment group and the top 20 enriched GO terms.**

(A) Significantly differentially expressed proteins between TNFα and TNFα + JQ1 treatment groups under shear stress (SS). The colours show normalized expression values for the differentially expressed proteins (rows) across samples (columns). Both rows and columns are ordered by

hierarchical clustering. The clustering is visualized using dendrograms at the top and at the left. The treatment groups show distinct clustering. **(B)**

The top 20 overrepresented gene ontology (GO) terms comparing TNF $\alpha$  and TNF $\alpha$  + JQ1 treatment groups under SS are ordered according to the normalized enrichment score (most enriched term at the top) and coloured by the adjusted p value. The size of the points represents the size of the term. As can be seen, GO terms related to cell cycle and metabolic processes are most strongly enriched.

**Table S1. Top 20 significantly differentially expressed proteins discovered among all treatment groups by ANOVA-like testing ordered according to significance.**

| Protein  | Average Expression | p value     | Adjusted p value | Protein Descriptions                              | Ensgene         |
|----------|--------------------|-------------|------------------|---------------------------------------------------|-----------------|
| SLC9A3R2 | 7.39847331         | 1.53234E-27 | 5.08125E-24      | Na(+)/H(+) exchange regulatory cofactor NHE-RF2   | ENSG00000065054 |
| FTH1     | 10.629059          | 6.26614E-26 | 1.03893E-22      | Ferritin heavy chain                              | ENSG00000167996 |
| FN1      | 11.51576524        | 1.85509E-25 | 1.56534E-22      | Isoform 1 of Fibronectin                          | ENSG00000115414 |
| FTL      | 9.622760966        | 1.88822E-25 | 1.56534E-22      | Ferritin light chain                              | ENSG00000087086 |
| EIF5     | 8.513574672        | 4.54818E-25 | 3.01635E-22      | Eukaryotic translation initiation factor 5        | ENSG00000100664 |
| HMOX1    | 11.46183291        | 1.96162E-24 | 1.08412E-21      | Heme oxygenase 1                                  | ENSG00000100292 |
| P4HA1    | 9.454305828        | 2.36744E-23 | 1.12149E-20      | Prolyl 4-hydroxylase subunit alpha-1              | ENSG00000122884 |
| NRP1     | 7.887329534        | 4.82122E-23 | 1.9984E-20       | Neuropilin-1                                      | ENSG00000099250 |
| TNFSF4   | 8.577782052        | 5.69281E-23 | 2.09749E-20      | Tumor necrosis factor ligand superfamily member 4 | ENSG00000117586 |
| HBA1     | 10.32080764        | 2.76832E-22 | 9.17974E-20      | Hemoglobin subunit alpha                          | ENSG00000206172 |
| SERPINH1 | 12.67097379        | 3.97193E-22 | 1.19736E-19      | Serpin H1                                         | ENSG00000149257 |
| PTPRB    | 7.834447345        | 1.63651E-21 | 4.52222E-19      | Receptor-type tyrosine-protein phosphatase beta   | ENSG00000127329 |
| GPX8     | 9.666582483        | 1.94209E-20 | 4.83723E-18      | Probable glutathione peroxidase 8                 | ENSG00000164294 |
| RAB5B    | 9.464157828        | 2.04225E-20 | 4.83723E-18      | Ras-related protein Rab-5B                        | ENSG00000111540 |
| SORBS2   | 7.765468741        | 5.81692E-20 | 1.28593E-17      | Sorbin and SH3 domain-containing protein 2        | ENSG00000154556 |

|                |             |             |             |                                                        |                 |
|----------------|-------------|-------------|-------------|--------------------------------------------------------|-----------------|
| <b>SQSTM1</b>  | 9.594663069 | 7.12894E-20 | 1.47747E-17 | Sequestosome-1                                         | ENSG00000161011 |
| <b>CD9</b>     | 10.00665303 | 7.94997E-20 | 1.55071E-17 | Tetraspanin                                            | ENSG00000010278 |
| <b>CAV1</b>    | 11.53978357 | 2.09811E-19 | 3.86519E-17 | Caveolin-1                                             | ENSG00000105974 |
| <b>ICAM1</b>   | 9.617511569 | 2.89168E-19 | 4.98981E-17 | Intercellular adhesion molecule 1                      | ENSG00000090339 |
| <b>C1QTNF5</b> | 9.101523    | 3.00953E-19 | 4.98981E-17 | Complement C1q tumor necrosis factor-related protein 5 | ENSG00000223953 |

**Table S2. Significantly up- or downregulated proteins under shear stress vs. control in relation to all discovered proteins.** 35 proteins are significantly differentially expressed. 21 are up- and 14 are downregulated under shear stress.

| Control vs. Shear Stress | Non significant | significant |                    |
|--------------------------|-----------------|-------------|--------------------|
| Down-Regulated           | 1553            | 14          |                    |
| Up-Regulated             | 1728            | 21          |                    |
| $\Sigma$                 | 3281            | 35          | <b>Total: 3316</b> |

**Table S3. Significantly up- or downregulated proteins in the JQ1 without shear stress group vs. control in relation to all discovered proteins.**

962 proteins are significantly differentially expressed. 404 are up- and 558 downregulated under JQ1.

| Control vs. JQ1 | Non significant | significant |                    |
|-----------------|-----------------|-------------|--------------------|
| Down-Regulated  | 1194            | 558         |                    |
| Up-Regulated    | 1160            | 404         |                    |
| $\Sigma$        | 2354            | 962         | <b>Total: 3316</b> |

**Table S4. Significantly up- or downregulated proteins in the JQ1 + TNF $\alpha$  with shear stress group vs. TNF $\alpha$  with SS in relation to all discovered proteins.** 955 proteins are significantly differentially expressed. 526 are up- and 429 downregulated under JQ1 + TNF $\alpha$ .

| TNF $\alpha$ vs. JQ1 + TNF $\alpha$ under Shear Stress | Non significant | significant |                    |
|--------------------------------------------------------|-----------------|-------------|--------------------|
| Down-Regulated                                         | 1062            | 429         |                    |
| Up-Regulated                                           | 1299            | 526         |                    |
| $\Sigma$                                               | 2361            | 955         | <b>Total: 3316</b> |

**Table S5. Top 20 significantly differentially expressed proteins discovered in the shear stress vs. control group ordered according to significance.**

| <b>Protein</b>       | <b>Average Expression</b> | <b>p value</b> | <b>Adjusted p value</b> | <b>Protein Descriptions</b>                          | <b>Ensgene</b>  |
|----------------------|---------------------------|----------------|-------------------------|------------------------------------------------------|-----------------|
| <b>SLC9A3R2</b>      | 7.39847331                | 3.47565E-13    | 1.15253E-09             | Na(+)/H(+) exchange regulatory cofactor NHE-RF2      | ENSG00000065054 |
| <b>HBA1</b>          | 10.32080764               | 9.39887E-13    | 1.55833E-09             | Hemoglobin subunit alpha                             | ENSG00000206172 |
| <b>PLAT</b>          | 7.433489845               | 1.18065E-09    | 1.30502E-06             | Tissue-type plasminogen activator                    | ENSG00000104368 |
| <b>HMOX1</b>         | 11.46183291               | 1.5531E-08     | 1.28752E-05             | Heme oxygenase 1                                     | ENSG00000100292 |
| <b>STING1</b>        | 8.738845293               | 2.38028E-08    | 1.5786E-05              | Stimulator of interferon response cGAMP interactor 1 | ENSG00000184584 |
| <b>NOS3</b>          | 7.073176879               | 7.74897E-08    | 4.2826E-05              | Nitric oxide synthase. endothelial                   | ENSG00000164867 |
| <b>ITPR3</b>         | 7.42922369                | 1.72222E-07    | 8.15841E-05             | Inositol 1,4,5-trisphosphate receptor type 3         | ENSG00000096433 |
| <b>DNASE1L1</b>      | 7.406114017               | 3.46328E-07    | 0.000143553             | Deoxyribonuclease-1-like 1                           | ENSG00000013563 |
| <b>HYAL2</b>         | 8.708874914               | 2.28588E-06    | 0.000842221             | Hyaluronidase-2                                      | ENSG00000068001 |
| <b>PLXNA2</b>        | 7.72602269                | 8.62245E-06    | 0.002859204             | Plexin-A2                                            | ENSG00000076356 |
| <b>NQO1</b>          | 7.474098828               | 1.21544E-05    | 0.003663984             | NAD(P)H dehydrogenase [quinone] 1                    | ENSG00000181019 |
| <b>LXN</b>           | 8.313569621               | 2.2551E-05     | 0.006231583             | Latexin                                              | ENSG00000079257 |
| <b>TPI1</b>          | 11.45701069               | 3.17862E-05    | 0.008080394             | Triosephosphate isomerase                            | ENSG00000111669 |
| <b>F5</b>            | 8.466895328               | 3.48665E-05    | 0.008080394             | Coagulation factor V                                 | ENSG00000198734 |
| <b>GYG1</b>          | 7.465747086               | 3.65518E-05    | 0.008080394             | Glycogenin-1                                         | ENSG00000163754 |
| <b>PLEC.Q15149_3</b> | 9.633755621               | 5.64375E-05    | 0.011312555             | Isoform 3 of Plectin                                 |                 |
| <b>DPYSL2</b>        | 10.64734467               | 5.79956E-05    | 0.011312555             | Dihydropyrimidinase-related protein 2                | ENSG00000092964 |
| <b>PLEC</b>          | 11.58752569               | 6.46601E-05    | 0.011911834             | Plectin                                              | ENSG00000178209 |
| <b>PLPP3</b>         | 8.038891931               | 8.09454E-05    | 0.01401305              | Phospholipid phosphatase 3                           | ENSG00000162407 |
| <b>PODXL</b>         | 8.255463603               | 8.45178E-05    | 0.01401305              | Podocalyxin                                          | ENSG00000128567 |

**Table S6. Top 20 significantly differentially expressed proteins discovered in the JQ1 without shear stress vs. control group ordered according to significance.**

| <b>Protein</b>  | <b>Average Expression</b> | <b>p value</b> | <b>Adjusted p value</b> | <b>Protein Descriptions</b>                     | <b>Ensgene</b>  |
|-----------------|---------------------------|----------------|-------------------------|-------------------------------------------------|-----------------|
| <b>SQSTM1</b>   | 9.594663069               | 4.21271E-17    | 1.39694E-13             | Sequestosome-1                                  | ENSG00000161011 |
| <b>NRP1</b>     | 7.887329534               | 2.26174E-16    | 3.74997E-13             | Neuropilin;Neuropilin-1                         | ENSG00000099250 |
| <b>EIF5</b>     | 8.513574672               | 3.64909E-16    | 4.03346E-13             | Eukaryotic translation initiation factor 5      | ENSG00000100664 |
| <b>FTH1</b>     | 10.629059                 | 9.64039E-16    | 7.99188E-13             | Ferritin heavy chain                            | ENSG00000167996 |
| <b>RAB5B</b>    | 9.464157828               | 1.15573E-14    | 7.66481E-12             | Ras-related protein Rab-5B                      | ENSG00000111540 |
| <b>FTL</b>      | 9.622760966               | 1.61977E-14    | 8.95191E-12             | Ferritin light chain                            | ENSG00000087086 |
| <b>OGDH</b>     | 9.473688552               | 4.13929E-14    | 1.96084E-11             | 2-oxoglutarate dehydrogenase, mitochondrial     | ENSG00000105953 |
| <b>NQO1</b>     | 7.474098828               | 6.41831E-14    | 2.66039E-11             | NAD(P)H dehydrogenase [quinone] 1               | ENSG00000181019 |
| <b>GTF2I</b>    | 8.301597414               | 1.50104E-13    | 5.53051E-11             | General transcription factor II-I               | ENSG00000263001 |
| <b>P4HA1</b>    | 9.454305828               | 2.44369E-13    | 8.10329E-11             | Prolyl 4-hydroxylase subunit alpha-1            | ENSG00000122884 |
| <b>GPX8</b>     | 9.666582483               | 5.94626E-13    | 1.79253E-10             | Probable glutathione peroxidase 8               | ENSG00000164294 |
| <b>PLAT</b>     | 7.433489845               | 1.61796E-12    | 4.47096E-10             | Tissue-type plasminogen activator               | ENSG00000104368 |
| <b>PI4K2A</b>   | 7.497889259               | 2.43798E-12    | 6.21872E-10             | Phosphatidylinositol 4-kinase type 2-alpha      | ENSG00000155252 |
| <b>A2M</b>      | 9.852662879               | 4.1507E-12     | 9.83122E-10             | Alpha-2-macroglobulin                           | ENSG00000175899 |
| <b>PTPRB</b>    | 7.834447345               | 6.24441E-12    | 1.38043E-09             | Receptor-type tyrosine-protein phosphatase beta | ENSG00000127329 |
| <b>CCAR2</b>    | 9.185597207               | 8.39148E-12    | 1.73914E-09             | Cell cycle and apoptosis regulator protein 2    | ENSG00000158941 |
| <b>AP2M1</b>    | 10.23082283               | 1.85962E-11    | 3.62736E-09             | Isoform 2 of AP-2 complex subunit mu            | ENSG00000161203 |
| <b>DPYSL2</b>   | 10.64734467               | 5.49059E-11    | 1.01149E-08             | Dihydropyrimidinase-related protein 2           | ENSG00000092964 |
| <b>MAGED2</b>   | 8.564668431               | 5.93056E-11    | 1.03504E-08             | Melanoma-associated antigen D2                  | ENSG00000102316 |
| <b>SLC9A3R2</b> | 7.39847331                | 9.63849E-11    | 1.59806E-08             | Na(+)/H(+) exchange regulatory cofactor NHE-RF2 | ENSG00000065054 |

**Table S7. Top 20 significantly differentially expressed proteins discovered in the JQ1 + TNF $\alpha$  under shear stress SS vs. TNF $\alpha$  under shear stress group ordered according to significance.**

| <b>Protein</b>  | <b>Average Expression</b> | <b>p value</b> | <b>Adjusted p value</b> | <b>Protein Descriptions</b>                                  | <b>Ensgene</b>  |
|-----------------|---------------------------|----------------|-------------------------|--------------------------------------------------------------|-----------------|
| <b>EIF5</b>     | 8.513574672               | 4.58533E-19    | 1.5205E-15              | Eukaryotic translation initiation factor 5                   | ENSG00000100664 |
| <b>FTL</b>      | 9.622760966               | 1.24105E-17    | 2.05765E-14             | Ferritin light chain                                         | ENSG00000087086 |
| <b>FTH1</b>     | 10.629059                 | 3.55049E-17    | 3.25015E-14             | Ferritin heavy chain                                         | ENSG00000167996 |
| <b>SLC9A3R2</b> | 7.39847331                | 3.92057E-17    | 3.25015E-14             | Na(+)/H(+) exchange regulatory cofactor NHE-RF2              | ENSG00000065054 |
| <b>SERPINH1</b> | 12.67097379               | 5.09695E-17    | 3.3803E-14              | Serpin H1                                                    | ENSG00000149257 |
| <b>TNFSF4</b>   | 8.577782052               | 1.66871E-15    | 9.2224E-13              | Tumor necrosis factor ligand superfamily member 4            | ENSG00000117586 |
| <b>STING1</b>   | 8.738845293               | 6.79797E-15    | 3.2203E-12              | Stimulator of interferon response cGAMP interactor 1         | ENSG00000184584 |
| <b>P4HA1</b>    | 9.454305828               | 3.76871E-14    | 1.53815E-11             | Prolyl 4-hydroxylase subunit alpha-1                         | ENSG00000122884 |
| <b>SORBS2</b>   | 7.765468741               | 4.1747E-14     | 1.53815E-11             | Sorbin and SH3 domain-containing protein 2                   | ENSG00000154556 |
| <b>PLSCR4</b>   | 8.406305397               | 5.40921E-14    | 1.72575E-11             | Phospholipid scramblase 4                                    | ENSG00000114698 |
| <b>FNDC3B</b>   | 8.104490586               | 5.84412E-14    | 1.72575E-11             | Fibronectin type III domain-containing protein 3B            | ENSG00000075420 |
| <b>NEK9</b>     | 6.827641138               | 6.24516E-14    | 1.72575E-11             | Serine/threonine-protein kinase Nek9                         | ENSG00000119638 |
| <b>MYADM</b>    | 10.08777569               | 2.4017E-12     | 6.11818E-10             | Myeloid-associated differentiation marker                    | ENSG00000179820 |
| <b>EOGT</b>     | 9.176582431               | 2.59305E-12    | 6.11818E-10             | EGF domain-specific O-linked N-acetylglucosamine transferase | ENSG00000163378 |
| <b>IGFBP7</b>   | 8.813039707               | 2.76757E-12    | 6.11818E-10             | Insulin-like growth factor-binding protein 7                 | ENSG00000163453 |
| <b>PCNA</b>     | 9.368632103               | 3.45943E-12    | 7.08945E-10             | Proliferating cell nuclear antigen                           | ENSG00000132646 |
| <b>MOGS</b>     | 10.73190186               | 3.63452E-12    | 7.08945E-10             | Mannosyl-oligosaccharide glucosidase                         | ENSG00000115275 |
| <b>CD9</b>      | 10.00665303               | 4.13328E-12    | 7.61441E-10             | Tetraspanin                                                  | ENSG00000010278 |
| <b>RALA</b>     | 10.97131834               | 4.74958E-12    | 8.00418E-10             | Ras-related protein Ral-A                                    | ENSG00000006451 |
| <b>GCLM</b>     | 8.503469345               | 4.82761E-12    | 8.00418E-10             | Glutamate-cysteine ligase regulatory subunit                 | ENSG00000023909 |
